# Twenty Years of DENV-2 Activity in Brazil: Molecular Characterization and Phylogeny of Strains Isolated from 1990 to 2010

Nieli Rodrigues da Costa Faria, Rita Maria Ribeiro Nogueira, Ana Maria Bispo de Filippis, Jaqueline Bastos Santos Simões, Fernanda de Bruycker Nogueira, Monique da Rocha Queiroz Lima, Flavia Barreto dos Santos\*

Flavivirus Laboratory, Oswaldo Cruz Institute, Manguinhos, Rio de Janeiro, Rio de Janeiro, Brazil

## Abstract

In Brazil, dengue has been a major public health problem since its introduction in the 1980s. Phylogenetic studies constitute a valuable tool to monitor the introduction and spread of viruses as well as to predict the potential epidemiological consequences of such events. Aiming to perform the molecular characterization and phylogenetic analysis of DENV-2 during twenty years of viral activity in the country, viral strains isolated from patients presenting different disease manifestations ( $n=34$ ), representing six states of the country, from 1990 to 2010, were sequenced. Partial genome sequencing (genes C/prM/M/E) was performed in 25 DENV-2 strains and full-length genome sequencing (coding region) was performed in 9 strains. The percentage of similarity among the DENV-2 strains in this study and reference strains available in Genbank identified two groups epidemiologically distinct: one represented by strains isolated from 1990 to 2003 and one from strains isolated from 2007 to 2010. No consistent differences were observed on the E gene from strains isolated from cases with different clinical manifestations analyzed, suggesting that if the disease severity has a genetic origin, it is not only due to the differences observed on the E gene. The results obtained by the DENV-2 full-length genome sequencing did not point out consistent differences related to a more severe disease either. The analysis based on the partial and/or complete genome sequencing has characterized the Brazilian DENV-2 strains as belonging to the Southeast Asian genotype, however a distinction of two Lineages within this genotype has been identified. It was established that strains circulating prior DENV-2 emergence (1990–2003) belong to Southeast Asian genotype, Lineage I and strains isolated after DENV-2 emergence in 2007 belong to Southeast Asian genotype, Lineage II. Furthermore, all DENV-2 strains analyzed presented an asparagine (N) in E<sub>390</sub>, previously identified as a probable genetic marker of virulence observed in DHF strains from Asian origin. The percentage of identity of the latter with the Dominican Republic strain isolated in 2001 combined to the percentage of divergence with the strains first introduced in the country in the 1990s suggests that those viruses did not evolve locally but were due to a new viral Lineage introduction in the country from the Caribbean.

**Citation:** Faria NRdC, Nogueira RMR, de Filippis AMB, Simões JBS, Nogueira FdB, et al. (2013) Twenty Years of DENV-2 Activity in Brazil: Molecular Characterization and Phylogeny of Strains Isolated from 1990 to 2010. *PLoS Negl Trop Dis* 7(3): e2095. doi:10.1371/journal.pntd.0002095

**Editor:** Ann M. Powers, Centers for Disease Control and Prevention, United States of America

**Received:** August 7, 2012; **Accepted:** January 22, 2013; **Published:** March 14, 2013

**Copyright:** © 2013 Faria et al. This is an open-access article distributed under the terms of the Creative Commons Attribution License, which permits unrestricted use, distribution, and reproduction in any medium, provided the original author and source are credited.

**Funding:** The authors want to thank FIOCRUZ, CNPq, FAPERJ and CAPES for the financial support. The funders had no role in study design, data collection and analysis, decision to publish, or preparation of the manuscript.

**Competing Interests:** The authors have declared that no competing interests exist.

\* E-mail: flaviab@ioc.fiocruz.br

## Introduction

Dengue viruses (DENV) are the most important human arboviruses worldwide, transmitted by mosquitoes of the genus *Aedes*. *Aedes aegypti* is the main vector. Explosive epidemics have become a public health problem, economic impact, socially and politically significant [1,2].

Currently it is estimated that 70 to 500 millions dengue infections occur annually in 124 endemic countries. Nearly 3.6 billion people (55% of world population) are at risk of contracting the disease (DVI). The rapid global spread of DENV in the last 50 years resulted in the dispersal of genotypes associated with increased severity [3].

The four serotypes (DENV-1, DENV-2, DENV-3 and DENV-4) are closely related yet antigenically distinct and contain a positive-sense RNA genome that is translated as a single

polyprotein and post-translationally cleaved into three structural proteins, capsid (C), premembrane (prM) and envelope (E), and seven nonstructural proteins, NS1, NS2A, NS2B, NS3, NS4A, NS4B and NS5. The RNA genome is packaged in an icosahedral capsid, and the nucleocapsid is surrounded by a lipid bilayer containing the E and M proteins [4,5].

DENV infection causes a spectrum of clinical disease ranging from an acute debilitating, self-limited febrile illness - dengue fever (DF) - to a life-threatening syndrome - dengue hemorrhagic fever/dengue shock syndrome (DHF/DSS) [6]. Despite the similar disease manifestations, the DENV are genetically diverse with approximately 40% of amino acid sequence divergence. Distinct DENV genotypes can be characterized when the genetic divergence are higher than to 6% [7].

A recent analysis of 1,827 complete E gene sequences supported the existence of six genotypes for DENV-2: Asian genotype I,

## Author Summary

In Brazil, the first dengue haemorrhagic cases were reported after the DENV-2 introduction in Rio de Janeiro, which spread to other states in the country. Aiming to perform the molecular characterization and phylogenetic analysis of DENV-2 during twenty years of viral activity in the country, strains isolated from patients presenting different disease manifestations were sequenced. Phylogeny characterized the DENV-2 as belonging to the Southeast Asian genotype, however a distinction of two Lineages within this genotype has been identified. Furthermore, all strains presented an asparagine in E<sub>390</sub>, previously identified as a probable genetic marker of virulence. The results show a temporal circulation of genetically different viruses in Brazil, probably due to the introduction of a new viral lineage from the Caribbean, which lead to the re-emergence of this serotype after 2007, causing the most severe epidemic already described in the country.

Asian genotype II, Southeast Asian/American genotype, Cosmopolitan genotype, American genotype and the Sylvatic genotype, the most genetically distinct genotype. Furthermore, the Southeast Asian/American genotype's topologies suggested a spatial division of this genotype into two major subclades [8].

In the Americas, the first DHF epidemics in the 80's were due to the introduction of the Southeast Asian/American genotype which replaced the American genotype and more severe cases with higher viremia were reported [9–11].

In Brazil, the disease has become a public health problem with explosive epidemics after the introduction of DENV-1 in 1986 in Rio de Janeiro [12]. However, the first DHF/DSS cases were only reported after the DENV-2 introduction in 1990 in the country [13,14]. From 1990 until the 26th epidemiological week of 2010, a total of 5,481,921 cases, including 17,203 cases of dengue hemorrhagic fever (DHF) and 1954 deaths were reported in the country [15].

Aiming to perform the phylogeny of the DENV-2 and its impact in the disease severity during 20 years of viral activity in Brazil, strains isolated from DF, DHF/DSS and fatal cases occurred since its introduction in 1990 until 2010, were analyzed. In this scenario, the partial sequencing (C/prM/M/E genes) of 25 DENV-2 strains was performed. To determine whether the evolutionary relationships observed for the C/prM/M/E genes were applicable to the complete genome, we further fully sequenced the coding regions of nine DENV-2 strains. In order to avoid mutations introduced by *in vitro* passages of the virus in cell cultures we used DENV-2 strains extracted directly from serum or originally isolated from cell cultures.

## Materials and Methods

### Ethical statement

The strains analyzed in this study belong to a previously-gathered collection from the Laboratory of Flavivirus, IOC/FIOCRUZ, Rio de Janeiro, Brazil, obtained from human serum through the passive surveillance system performed by the Laboratory from an ongoing Project approved by resolution number CSN196/96 from the Oswaldo Cruz Foundation Ethical Committee in Research (CEP 274/05), Ministry of Health-Brazil. Samples were chosen anonymously, based on the laboratorial results and clinical manifestations input on the Laboratory database.

### Viral strains

Viral strains consisted of DENV-2 ( $n=34$ ) isolated during epidemics occurred from 1990 to 2010 in six states in Brazil (Table 1). Each sample was accompanied by identification form containing clinical and epidemiological data. All strains were determined as DENV-2 serotype by reverse transcriptase polymerase chain reaction (RT-PCR) and or/virus isolation from DF ( $n=19$ ), DHF ( $n=3$ ), DSS ( $n=1$ ) and fatal cases ( $n=4$ ; 1 from DF, 2 from DHF and 1 with no classification available). Seven cases were not classified due to data unavailability.

### RNA extraction

Viral RNA was extracted from infected cell culture supernatant or directly from the patients' serum using QIAamp Viral RNA Mini kit (Qiagen) following the manufacturer's instructions and stored at  $-70^{\circ}\text{C}$  for DENV typing and sequencing.

### RT-PCR (Reverse transcriptase- polymerase chain reaction)

RT-PCR for detecting and typing DENV was performed as described previously [16]. Briefly, consensus primers were used to anneal to any of the four DENV types and amplify a 511-bp product in a reverse transcriptase-polymerase reaction. A cDNA copy of a portion of the viral genome was produced in a reverse transcriptase reaction. After a second round of amplification (nested PCR) with type-specific primers, DNA products of unique size for DENV-2 (119 bp) were generated.

### Dengue virus isolation

Virus isolation was performed by inoculation into C6/36 *Aedes albopictus* cell line [17] and isolates were identified by indirect fluorescent antibody test (IFAT) using serotype-specific monoclonal antibodies [18]. Briefly, patients' sera were inoculated into C6/36 *Aedes albopictus* cell monolayers in L-15 Medium (Leibovitz, Sigma) supplemented with 2% fetal calf serum (FCS, Invitrogen) and 0.2 mM of nonessential amino acids (Invitrogen). Cells were incubated at  $28^{\circ}\text{C}$  for 5 to 7 days and observed for cytopathic effects. Infected supernatant was clarified by centrifugation and virus stocks stored in 1-mL aliquots at  $-70^{\circ}\text{C}$  until use.

### Sequencing

Reverse transcription (RT) was performed using 5  $\mu\text{L}$  of extracted RNA in 25  $\mu\text{L}$  of AccessQuick RT-PCR System (Promega Corporation) and specific oligonucleotides primers (Table 1). To amplify the C/prM/M/E region of 2,325 bp, specific primers (1 to 4) were used to produce 4 overlapping amplicons of approximately 900 bp and to amplify the complete coding region (10,173 bp), 15 overlapping amplicons of approximately 900 bp (1 to 15). Thermocycling conditions consisted of a single step of  $42^{\circ}\text{C}$  for 60 minutes and 40 cycles of denaturation at  $94^{\circ}\text{C}$  (30 seconds), annealing at  $56^{\circ}\text{C}$  or  $63^{\circ}\text{C}$  (60 seconds) depending on the set of primers, extension at  $72^{\circ}\text{C}$  (2 minutes) and a final extension at  $72^{\circ}\text{C}$  (10 minutes). Amplification was conducted using a Model 9700 thermal cycler (Applied Biosystems). PCR products were purified from 1.0% agarose gels using QIAquick Gel extraction Kit or QIAquick PCR purification Kit (Qiagen) and used as template for cycle sequencing. Sequencing reactions were performed as recommended in the BigDye Dideoxy Terminator sequencing kit (Applied Biosystems) and the products were analyzed using an automated 3130 DNA Sequencer (Applied Biosystems). Partial sequences (C/prM/M/E) and complete coding sequences for the unprocessed polyprotein (5' and 3' noncoding regions excluded) were deposited in GenBank (Table 2).

**Table 1.** Primers used for amplification of the partial and complete genes (coding region) from Brazilian DENV-2.

| Primers Designation | Sense A (5'→3')                  | Anti-sense B (5'→3')          | Position in the genome (according to AF489932) | Amplicon (pb) | Tm (°C) A/B |
|---------------------|----------------------------------|-------------------------------|------------------------------------------------|---------------|-------------|
| 1                   | CGT GGA CCG ACA AAG ACA GA       | GGA GCG ACG GCT GTC AGT AA    | 14–906                                         | 892           | 62/64       |
| 2                   | GAT CAG TGG CAC TCG TTC CA       | CTC CGG GTAGCCATGGTAAC        | 708–1586                                       | 878           | 62/62       |
| 3                   | ATG GCA CTG TCA CGA TGG AG       | CAC TAT CAG CCTGCACCATAGCT    | 1467–2405                                      | 938           | 62/63       |
| 4                   | GGA TCC CTG GGA GGA GTG TT       | TCC ATT GCT CCA GAG GGT GT    | 2202–3106                                      | 904           | 63/63       |
| 5                   | GAC TCA AAA CTC ATG TCA GCG G    | GTG CTT TGG GAA AGG AGT GC    | 2958–3800                                      | 842           | 62/62       |
| 6                   | GGG CGT TAC CAT GAC GGA T        | GCC CAT GAT GGT TCA ATC CTT   | 3656–4709                                      | 1053          | 63/63       |
| 7                   | AAT TAC GGC AGC AGC ATG GT       | GGA GGA GTG GCT GTC ATG AAA   | 4475–5456                                      | 981           | 63/63       |
| 8                   | CAG CCA TCA GAA CCG AGC A        | CCA CCT TCT GTC TGC GTA GTT G | 5254–6185                                      | 931           | 64/62       |
| 9                   | ACA CAC CTG AAG GAA TCA TTCCTA G | TGA CAA ATG TTG TAG CCA CGG   | 6016–6948                                      | 932           | 62/62       |
| 10                  | AGC CAT CCT CAC AGT GGT GG       | TCT CAG TTT TGC TGA GCC TCG   | 6791–7737                                      | 946           | 64/63       |
| 11                  | CTA TTT GGC CGG AGC TGG A        | TTT CAA TTC CAA TGT TGC GG    | 7508–8354                                      | 846           | 63/62       |
| 12                  | ATG GAG GAG CTT TAG TGA GGA ATC  | CGT GCT CCA AGC CAC ATG TA    | 8170–8994                                      | 824           | 61/63       |
| 13                  | GAA ATC GGC TCG TGA GGC T        | TCA TCT TGG TTT CTG CAT GGG   | 8825–9746                                      | 921           | 63/63       |
| 14                  | GAC AGT CAC AGA AGA AAT CGC TGT  | CTA TGG CTT GAT CCG ACC TGA   | 9473–10304                                     | 831           | 62/62       |
| 15                  | CGG CTC ATT GAT TGG GCT AA       | TTC TGT GCC TGG AAT GAT GCT   | 10109–10662                                    | 553           | 63/63       |

doi:10.1371/journal.pntd.0002095.t001

### Sequences and phylogenetic analysis

The analysis of similarities, percentage of identity and divergence among the strains analyzed were performed using Megalin Program (DNASTar, www.dnastar.com). The multiple alignment was performed using CLUSTAL W (<http://www.ebi.ac.uk/clustalw/>) and the phylogenetic analysis by MEGA 4 software ([www.megasoftware.net](http://www.megasoftware.net)), using the Maximum Likelihood method (ML), according to the Tamura-Nei model, with a bootstrap of 1,000 replications. Strains representative from the five genotypes available in Genbank ([www.ncbi.nlm.nih.gov](http://www.ncbi.nlm.nih.gov)) were used for the comparison, DENV-1 (GenBank accession number GU370049), DENV-3 (accession number EF629369), and DENV-4 (accession number AF289029) strains were used as outgroup to root the trees (Table 3).

### Results

In this study, the strains BR64022/98 isolated in the 90's and Jamaica 1983 were considered as reference strains for comparison purposes. The percentage of similarity among the 25 DENV-2 strains ranged from 80.3 to 99.9% when those compared to each other and to strains representative of the different genotypes available on GenBank. The partial genome sequencing analysis characterized the Brazilian DENV-2 strains from this study as belonging to the Southeast Asian genotype, however a distinction of two Lineages within this genotype has been identified. It was observed that strains circulating prior DENV-2 emergence (1990–2003) belong to Southeast Asian genotype, Lineage I and strains isolated after DENV-2 emergence in 2007 belong to Southeast Asian genotype, Lineage II (Figures 1 and 2). Furthermore, the latter were more closely related to strains from the Dominican Republic (DR59/01), representative from the Southeast Asian genotype, Lineage II.

When the 25 DENV-2 strains were compared to the strain BR64022/98, amino acid substitutions leading to change in the biochemical properties were observed on the C and prM genes. On the E gene, a total of twelve substitutions were observed, with nine resulting in a change on the amino acid change of biochemical property (Supplementary material 1). No consistent

differences were observed on the E gene from strains isolated from cases with different clinical manifestations analyzed, suggesting that if the disease's severity has a genetic origin, it is not only due to the differences observed on the E gene.

To determine whether possible amino acids differences on other genes were related to disease severity, we fully analyzed (coding region) DENV-2 strains ( $n = 9$ ), representative of DF cases isolated from 1990 to 1999 and strains isolated from fatal cases occurred after the DENV-2 re-emergence after 2007 until 2010. The strain 0450/2008, representative of the DENV-2 re-emergence isolated from a DF secondary case who evolved to death was fully sequenced and its comparison to the strain from the Dominican Republic (DR59/2001), representative of the DENV-2 re-emergence, showed 22 amino acid substitutions. Likewise, the strain 0690/2008 isolated from a DHF case occurred also during the re-emergence of DENV-2 had nine amino acid substitutions when compared to the strain DR59/2001, with seven of those leading to amino acid biochemical property change (Table S1).

The DENV-2 strain 0337/2008 isolated from a newborn presenting a high anti-DENV IgG titer who evolved to death, infected probably due transplacental transmission as his mother was diagnosed with acute DENV infection, showed substitutions on NS2A, NS4A and NS5, which were shared with the other two strains isolated from fatal cases (Table S2). The results obtained by the DENV-2 full-length genome sequencing did not point out consistent differences related to a more severe disease.

A substitution on E<sub>390</sub> (N→D) was reported as resulting in a reduction in viral replication in macrophages and dendritic cells [19] whereas E<sub>390</sub> (D→N) resulted in enhanced replication, maturation and activation of macrophages, enhancement of the immune response with an increased production of cytokines, increased vascular permeability and consequently a greater chance of developing DHF [20]. All DENV-2 strains analyzed presented an asparagine (N) in E<sub>390</sub>, previously identified as a probable genetic marker of virulence observed in DHF strains from Asian origin.

The percentage of identity of the re-emergent DENV-2 with the Dominican Republic strain isolated in 2001 combined to the

**Table 2.** DENV-2 used in this study for partial ( $n = 25$ ) and complete coding region ( $n = 9$ ) sequencing.

| Strain # | Year of isolation | State of origin | Clinical manifestation | Immune response | Age     | Gender | Sequence region | Access number GenBank |
|----------|-------------------|-----------------|------------------------|-----------------|---------|--------|-----------------|-----------------------|
| 44298    | 1991              | BA              | DF                     | S               | NA      | Fem    | C/prM/M/E       | HQ012508              |
| 48578    | 1994              | CE              | NA                     | ND              | NA      | Male   | C/prM/M/E       | HQ012509              |
| 51222    | 1995              | RJ              | NA                     | ND              | NA      | Fem    | C/prM/M/E       | HQ012510              |
| 52477    | 1995              | RJ              | NA                     | ND              | NA      | Fem    | C/prM/M/E       | HQ012511              |
| 55769    | 1996              | RS*             | DF                     | ND              | 10      | Male   | C/prM/M/E       | HQ012512              |
| 55803    | 1996              | BA              | NA                     | S               | NA      | Fem    | C/prM/M/E       | HQ012513              |
| 58448    | 1997              | RN              | DF                     | ND              | NA      | Male   | C/prM/M/E       | HQ012514              |
| 59382    | 1997              | RN              | DHF/Fatal              | ND              | NA      | Male   | C/prM/M/E       | HQ012515              |
| 63291    | 1998              | RJ              | DF                     | ND              | 16      | Male   | C/prM/M/E       | HQ012516              |
| 64625    | 1999              | RJ              | DF                     | ND              | 34      | Male   | C/prM/M/E       | HQ012517              |
| 66985    | 2000              | RJ              | DF                     | ND              | 39      | Male   | C/prM/M/E       | HQ012518              |
| 67955    | 2000              | RJ              | DHF                    | ND              | 27      | Male   | C/prM/M/E       | HQ012519              |
| 69221    | 2001              | RJ              | DF                     | ND              | 28      | Male   | C/prM/M/E       | HQ012520              |
| 72308    | 2001              | RJ              | DF                     | ND              | 62      | Fem    | C/prM/M/E       | HQ012521              |
| 75103    | 2002              | RJ              | DF                     | ND              | 61      | Masc   | C/prM/M/E       | HQ012522              |
| 76012    | 2002              | ES              | NA                     | ND              | 41      | Fem    | C/prM/M/E       | HQ012523              |
| 77395    | 2003              | ES              | NA                     | ND              | 50      | Male   | C/prM/M/E       | HQ012524              |
| 86977    | 2007              | RJ              | DHF                    | ND              | 7       | Male   | C/prM/M/E       | HQ012525              |
| 88034    | 2007              | RJ              | DF                     | ND              | 12      | Male   | C/prM/M/E       | HQ012526              |
| 0030     | 2008              | RJ              | DF                     | S               | 13      | Male   | C/prM/M/E       | HQ012527              |
| 0832     | 2008              | RJ              | DHF                    | S               | 8       | Fem    | C/prM/M/E       | HQ012528              |
| 066      | 2009              | BA              | DF                     | ND              | 1 month | Male   | C/prM/M/E       | HQ012529              |
| 0145     | 2009              | ES              | DF                     | ND              | 16      | Male   | C/prM/M/E       | HQ012530              |
| 023      | 2010              | RJ              | DF                     | ND              | 73      | Male   | C/prM/M/E       | HQ012531              |
| 0199     | 2010              | RJ              | DSS                    | S               | 50      | Fem    | C/prM/M/E       | HQ012532              |
| 39145    | 1990              | RJ              | DF                     | ND              | 41      | Fem    | Complete CR     | HQ012538              |
| 41768    | 1990              | RJ              | DF                     | ND              | 10      | Male   | Complete CR     | HQ012533              |
| 42727    | 1991              | RJ              | DF                     | P               | NI      | Fem    | Complete CR     | HQ012534              |
| 48622    | 1994              | CE              | NA                     | ND              | NI      | Fem    | Complete CR     | HQ012535              |
| 61310    | 1998              | RJ              | DF                     | ND              | 47      | Fem    | Complete CR     | HQ012536              |
| 64905    | 1999              | RJ              | DF                     | ND              | 52      | Fem    | Complete CR     | HQ012537              |
| 0337     | 2008              | RJ              | Fatal                  | S               | 5 days  | NA     | Complete CR     | NA                    |
| 0450     | 2008              | RJ              | DF/Fatal               | S               | 46      | Male   | Complete CR     | NA                    |
| 0690     | 2008              | RJ              | DHF/Fatal              | S               | 32      | Male   | Complete CR     | HQ026763              |

BA: Bahia, CE: Ceará, RJ: Rio de Janeiro, RS: Rio Grande do Sul, RN: Rio Grande do Norte, ES: Espírito Santo; DF: Dengue Fever; DHF: Dengue Hemorrhagic Fever; DSS: Dengue Shock Syndrome; Fem: Female; Male; C/prM/M/E: Capsid/pré-membrane/Membrane/Envelope; Complete CR: Complete coding region;

\*Imported case; NA: Not available; ND: Not done; P: primary infection; S: secondary infection.

doi:10.1371/journal.pntd.0002095.t002

percentage of divergence with the strains first introduced in the country in the 90's suggests that those viruses did not evolved locally but were due to a new viral Lineage introduction in the country from the Caribbean.

## Discussion

In the Americas, the first DENV-2 was isolated in 1953 in Trinidad [21] and the first DHF epidemic caused by this serotype occurred in Cuba in 1981 after the introduction of DENV-2 genotype originated in Southeast Asia [10,22]. Epidemics studies showed that the DENV-2 introduced in Brazil, Colombia, Venezuela and Mexico had a common ancestor with isolates

from Southeast Asia, suggesting the direct transmission from that region to the Americas [23].

In Brazil, the first DHF/DSS cases were reported after the DENV-2 introduction in Rio de Janeiro [13,24,25], which spread to other states in the country. Phylogenetic analysis of DENV-2 strains circulating at that time confirmed the genotype circulating in Southeast Asia [26,27]. This observation was further corroborated in an extensive analysis of viruses from the states of Rio de Janeiro (1990 and 1995), Ceará (1994), Bahia (1994 and 1999), Maranhão (1996 and 1998), Mato Grosso (1997), Pará (1998), Rio Grande do Norte (1998), Paraíba (1999) Sergipe (1999), Espírito Santo (1995 and 2000) and forty strains isolated in Pernambuco (1995–2002) [28,29].

**Table 3.** Strains representative of the different DENV-2 genotypes and strains used as outgroup for comparison purposes.

| Strain #                | Year of isolation | Country            | Genotype                    | GenBank Accession # |
|-------------------------|-------------------|--------------------|-----------------------------|---------------------|
| BR64022                 | 1998              | Brazil             | Southeast Asia (Lineage I)  | AF489932            |
| BID-V3496               | 1990              | Venezuela          | Southeast Asia (Lineage I)  | GQ868540            |
| N.1409                  | 1983              | Jamaica            | Southeast Asia (Lineage I)  | M20558              |
| BID-V2683               | 1999              | Nicaragua          | Southeast Asia (Lineage II) | GQ199895            |
| BID-V2996               | 2007              | Nicaragua          | Southeast Asia (Lineage II) | GQ199868            |
| BID-V595                | 2006              | Puerto Rico        | Southeast Asia (Lineage II) | EU482726            |
| BID-V1439               | 2005              | Puerto Rico        | Southeast Asia (Lineage II) | EU687216            |
| DR23/01                 | 2001              | Dominican Republic | Southeast Asia (Lineage II) | AB122020            |
| DR59/01                 | 2001              | Dominican Republic | Southeast Asia (Lineage II) | AB122022            |
| BID-V3653               | 2008              | Brazil             | Southeast Asia (Lineage II) | GU131885            |
| China-04                | 1985              | China              | Asian II                    | AF119661            |
| New Guinea C            | 1944              | New Guinea         | Asian II                    | AF038403            |
| Strain 44               | 1989              | China              | Asian II                    | AF204177            |
| TB16i                   | 2004              | Indonesia          | Asian I                     | AY858036            |
| 98900666 DSS DV-2       | 1998              | Indonesia          | Asian I                     | AB189124            |
| IQT1797                 | 1995              | Peru               | American                    | AF100467            |
| strain 131              | 1992              | Mexico             | American                    | AF100469            |
| isolate 1328            | 1977              | Puerto Rico        | American                    | EU056812            |
| Dak Ar D75505           | 1991              | Senegal            | Sylvatic                    | EF457904            |
| DENV-1-SGEHI(D1)1494Y08 | 2008              | Singapore          | -                           | GU370049            |
| BRDEN3 290-02           | 2002              | Brazil             | -                           | EF629369            |
| DENV-4-Guangzhou B5     | 2000              | China              | -                           | AF289029            |

doi:10.1371/journal.pntd.0002095.t003

After seven years without activity in Brazil, DENV-2 re-emerged in April of 2007 in the state of Rio de Janeiro causing the more severe dengue epidemic in the country in 2008 [30,31]. Phylogenetic analysis of DENV-2 circulating in 90's and after its re-emergence identified two distinct lineages within the Southeast Asian genotype [32].

In the present study, the analysis based on the sequencing of the C/prM/M/E genes (2,325 bp) from 25 DENV-2 Brazilian isolates divided those strains in two distinct groups, one formed by DENV-2 isolated from 1991 to 2003 and another with strains isolated from 2007 to 2010 following the re-emergence of this serotype in the country. Corroborating previous phylogeny [26–29] strains isolated from 1991 to 2003 were classified as Southeast Asian genotype, Lineage I and presenting similarities with the Brazilian strain BR64022/98 and the strain Jamaica/83. However, the strains isolated between 2007 and 2010, showed higher similarity with the strain DR59/01, from the Dominican Republic, representing the Southeast Asian genotype, Lineage II, corroborating the analysis by Oliveira *et al* [32]. A study by Aquino *et al* [33] demonstrated that DENV-2 strains from Paraguay could also be grouped into two distinct lineages within the Southeast Asian genotype and suggested the introduction of a new lineage possibly associated a serotype shift from DENV-3 to DENV-2, as observed in Brazil in 2007 and 2008 [31].

The absence of DENV-2 circulation in the years prior to its re-emergence and the high similarity observed between those viruses and the strain isolated in the Dominican Republic in 2001, suggests the introduction of a new lineage of DENV-2 causing the 2008 epidemic in Brazil. Romano *et al* [34] also demonstrated that

DENV-2 strains isolated in Sao Paulo State in 2010 were in a monophyletic group with the strains circulating in Rio de Janeiro in 2007 and 2008 and that those were closely related to strains isolated in Cuba and Dominican Republic, with a small genetic distance, suggesting that this new lineage of DENV-2 re-emerged in of Brazil may have been imported the Caribbean. Although genetic variants of DENV have been implicated in disease severity in the past [35,36], it was with the advance of evolutionary studies based on phylogenetic analysis combined to epidemiological data that genotypes within the distinct serotypes were associated with a greater or lesser disease severity [11,37–40].

The strain isolated from a DHF case in 2000 (strain RJ/67922/2000) presented an exclusive substitution on prM<sub>143</sub> (T→I) when compared to the other strains analyzed in this study. However, substitutions related to DHF/DSS cases were identified on prM<sub>16</sub> and prM<sub>81</sub> [41].

Substitutions were found on the residues E<sub>129</sub> (V→I) and E<sub>131</sub> (L→Q), and these are related to the division of the Southeast Asian genotype in two distinct clades, corroborating the observations that amino acids on E<sub>129</sub> and E<sub>131</sub> are in critical markers for genetic classification of DENV [33,42].

All 34 strains analyzed in this study presented an asparagine (N) on E<sub>390</sub>, previously characterized as a probable trigger for DHF detected in strains of Asian origin [43]. Mutations on the flavivirus domain III of E protein can induce virulence or attenuation of the virus to escape from the immune system [44,45] and in this study, changes were observed throughout this domain (aa 297 to 394). The DHF case, which culminated in death (59382/1997) showed amino acid differences only in

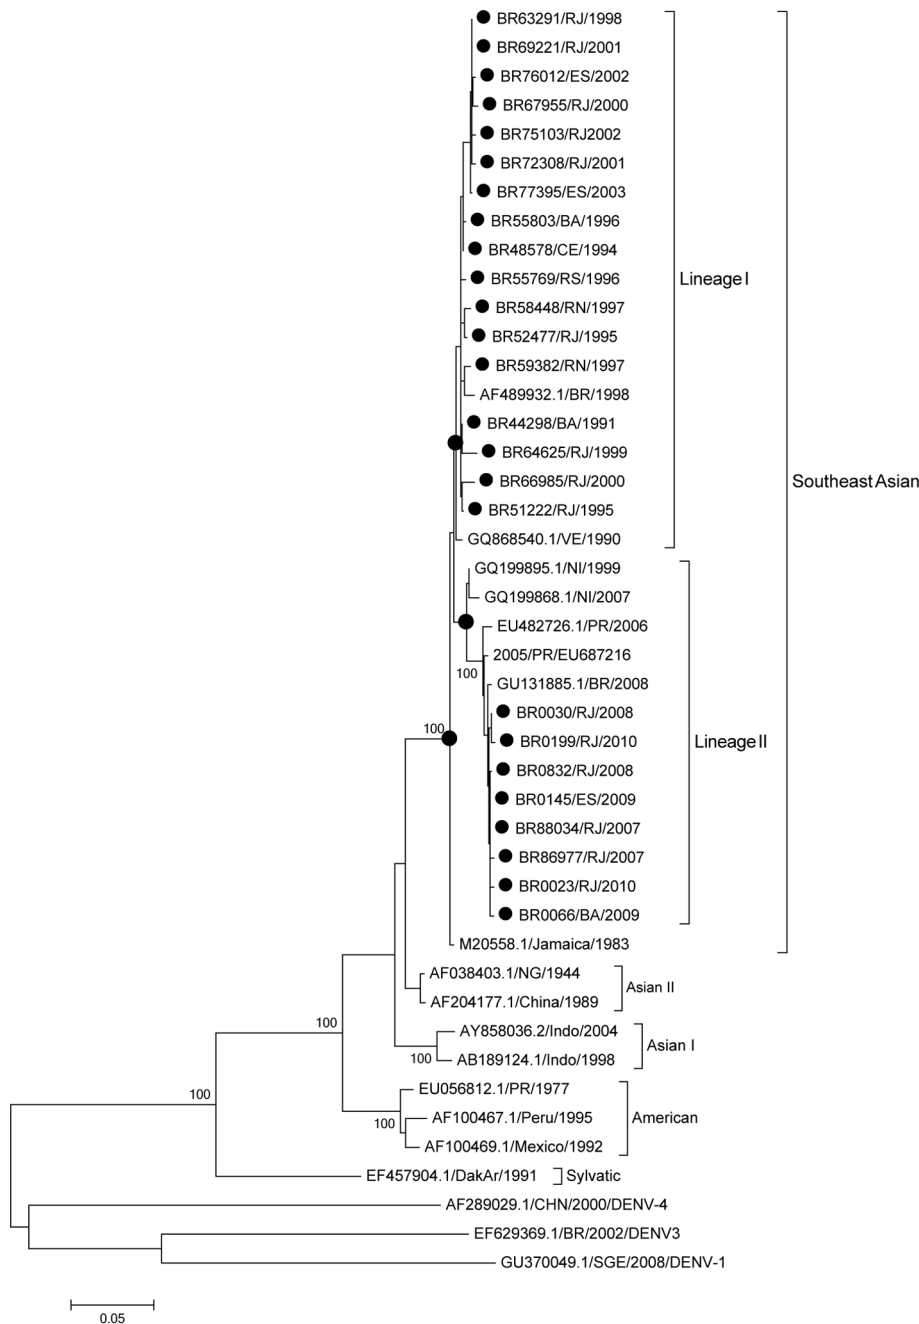

**Figure 1. Maximum likelihood phylogeny based on the C/prM/M/E genes of 25 Brazilian DENV-2, 1991–2010.** Black circles represent DENV-2 sequences generated in this study. Strains representative from the four genotypes available in Genbank ([www.ncbi.nlm.nih.gov](http://www.ncbi.nlm.nih.gov)) were used for the comparison, DENV-1, DENV-3 and DENV-4 strains were used as outgroup to root the trees. The percentage of replicate trees in which the associated taxa clustered together in the bootstrap test (1000 replicates) is shown next to the branches. DENV strains used were named as follows: Country/strain number/state/year. RJ: Rio de Janeiro, ES: Espírito Santo, CE: Ceará, BA: Bahia, RS: Rio Grande do Sul, RN: Rio Grande do Norte. doi:10.1371/journal.pntd.0002095.g001

the E gene, but those differences were shared with other DF cases strains, when they were compared to the strain BR64022/98.

In this study, a substitution on prM<sub>39</sub> was observed on the strain 0690/2008 isolated from a DHF case with a fatal outcome, on the strain 55769/1996 from a DF case and on the strain 0199/2010.. Catteau *et al* [46] demonstrated that the intracellular production of M ectodomain of all four DENV serotypes of DENV induce apoptosis in host cells. The carboxy terminus of prM protein with

nine amino acids (aa 32–40) of some flaviviruses was designated as Apopto M [46] and appears to play an important role in inducing apoptosis and cytopathic effects [46–48].

Several changes were observed along the NS protein genes. Studies conducted by Yábar, [49] show that mutations in NS1 are related to the development of DHF/DSS cases when they were compared to patients with DF.

Despite the functional importance of mutations in NS genes remains unknown, future studies can elucidate their role in the

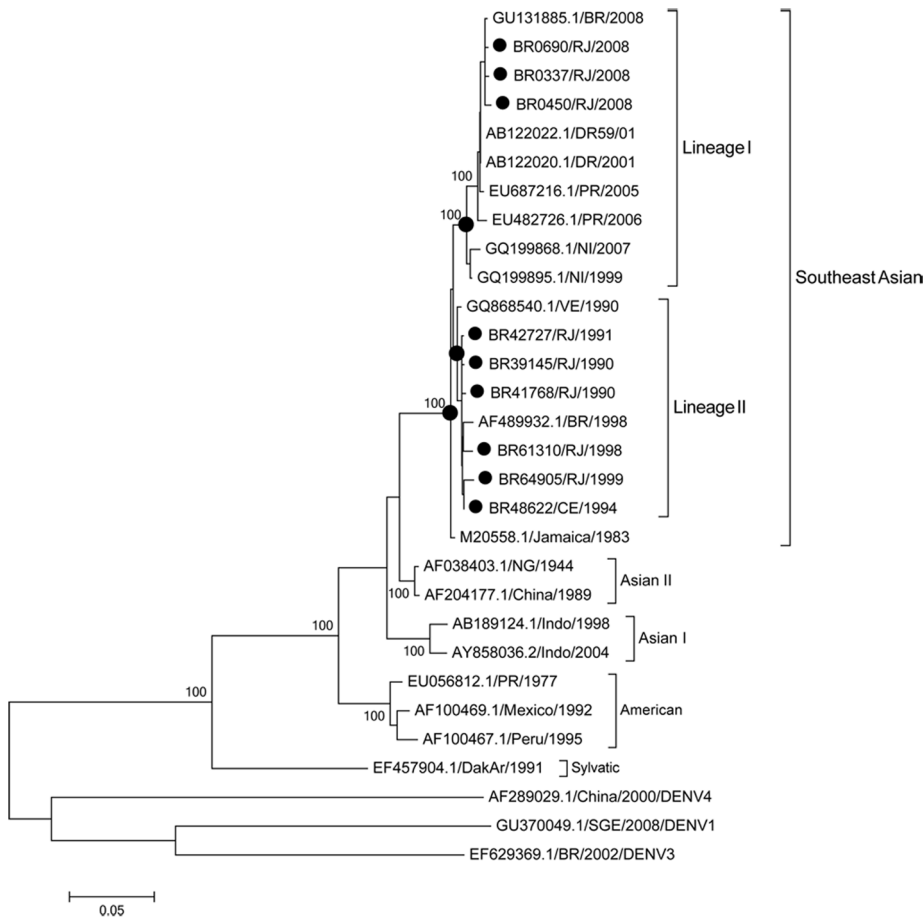

**Figure 2. Maximum likelihood phylogeny based on the complete coding region sequencing of 9 Brazilian DENV-2, 1990–2008.** Black circles represent DENV-2 sequences generated in this study. Strains representative from the four genotypes available in Genbank ([www.ncbi.nlm.nih.gov](http://www.ncbi.nlm.nih.gov)) were used for the comparison, DENV-1, DENV-3 and DENV-4 strains were used as outgroup to root the trees. The percentage of replicate trees in which the associated taxa clustered together in the bootstrap test (1000 replicates) is shown next to the branches. DENV strains used were named as follows: Country/strain number/state/year. RJ: Rio de Janeiro and CE: Ceará. doi:10.1371/journal.pntd.0002095.g002

emergence of strains and/or pathogenesis of the disease. It was not possible to correlate the role of Lineage II emergence with an increased severity of cases observed in the period between the years 2007–2010. Furthermore, the occurrence of secondary infection may have been the risk factor for the development of more severe cases.

In conclusion, this result shows a temporal circulation of genetically different viruses in Brazil probably due to the introduction of a new viral lineage from the Caribbean which lead to the re-emergence of this serotype after 2007. In 2007–2008, DENV-2 was responsible for most severe epidemic already described in the country, with 787,726 cases reported and 491 deaths [31]. Moreover, the Caribbean has been suggested as an important region for the circulation of DENV-2, importation and exportation of strains from and to Central America and South America [42,50,51].

In the past 20 years, DENV-2 activity in Brazil has contributed significantly to changes in the disease morbidity and sudden age shift [30]. In dengue endemic countries, displacement of DENV serotypes, genotypes and lineages have been reported previously and have been associated with changes in the disease severity [40,52–55]. This emphasizes the need of straightening virological

surveillance to monitor the emergence or re-emergence of DENV strains with pathogenic potential to cause epidemics.

### Supporting Information

**Table S1 Molecular characterization of DENV-2 strains isolated in Brazil based on the partial genes analysis.** (DOCX)

**Table S2 Molecular characterization of DENV-2 isolated in Brazil based on the complete coding region analysis.** (DOCX)

### Acknowledgments

To José da Costa Farias Filho and Leda Maria do Santos for virus isolation and identification, to Joselio Araujo for primer design. To Simone Alves Sampaio and Eliane Saraiva M de Araújo for laboratorial support.

### Author Contributions

Conceived and designed the experiments: FBdS RMRN AMBdF. Performed the experiments: NRdCF JBSS FdBN MdRQL. Analyzed the

data: NRdCF FdBN. Contributed reagents/materials/analysis tools: RMRN. Wrote the paper: NRdCF FBdS.

## References

- Gubler DJ, Meltzer M (1999) Impact of dengue/dengue hemorrhagic fever on the developing world. *Adv Virus Res* 53: 35–70.
- Gubler D (2002) The global emergence/resurgence of arboviral diseases as public health problems. *Arch Med Res* 33: 330–342.
- Kyle J, Harris E (2008) Global spread and persistence of dengue. *Annu Rev Microbiol* 62: 71–92.
- Heinz FX, Collet MS, Purcell RH, Gould EA, Howard CR, et al. (2000) Family *Flaviviridae*. In: van Regenmortel MHV, Fauquet CM, Bishop DHL, Carsten EB, Estes MK, et al., editors. *Virus Taxonomy: Seventh Report of the International Committee on Taxonomy of Viruses*. San Diego, CA: Academic Press 859–878 p.
- Lindenbach BD, Rice CM (2001) *Flaviviridae: The viruses and their replication*. In: Knipe DM, Howley PM, Griffin DE, Lamb RA, Martin MA et al., editors. *Fields Virology*. 4 ed. Philadelphia: Lippincott Williams & Wilkins. 991–1041.
- WHO (2009) *Dengue: Guidelines for diagnosis, treatment, prevention and control*. Geneva, Switzerland: WHO.
- Twiddy SS, Farrar JJ, Vinh Chau N, Wills B, Gould EA, et al. (2002) Phylogenetic relationships and differential selection pressures among genotypes of dengue-2 virus. *Virology* 298: 63–72.
- Chen R, Vasilakis N (2011) Dengue—*quo tu et quo vadis?* *Viruses* 3: 1562–1608.
- Lewis J, Chang G, Lanciotti R, Kinney R, Mayer L, et al. (1993) Phylogenetic relationships of dengue-2 viruses. *Virology* 197: 216–224.
- Guzman M, Deubel V, Pelegrino J, Rosario D, Marrero M, et al. (1995) Partial nucleotide and amino acid sequences of the envelope and the envelope/nonstructural protein-1 gene junction of four dengue-2 virus strains isolated during the 1981 Cuban epidemic. *Am J Trop Med Hyg* 52: 241–246.
- Rico-Hesse R, Harrison LM, Salas RA, Tovar D, Nisalak A, et al. (1997) Origins of dengue type 2 viruses associated with increased pathogenicity in the Americas. *Virology* 230: 244–251.
- Schatzmayr H, Nogueira R, Travassos da Rosa A (1986) An outbreak of dengue virus at Rio de Janeiro—1986. *Mem Inst Oswaldo Cruz* 81: 245–246.
- Nogueira R, Miagostovich M, Lampe E, Schatzmayr H (1990) Isolation of dengue virus type 2 in Rio de Janeiro. *Mem Inst Oswaldo Cruz* 85: 253.
- Nogueira R, Miagostovich M, Lampe E, Souza R, Zagne S, et al. (1993) Dengue epidemic in the stage of Rio de Janeiro, Brazil, 1990–1: co-circulation of dengue 1 and dengue 2 serotypes. *Epidemiol Infect* 111: 163–170.
- SVS/MS (2010) *Informe Epidemiológico da Dengue - Análise de situação e tendências - 2010*. [http://www.dengue.org.br/informe\\_da\\_dengue\\_2010.pdf](http://www.dengue.org.br/informe_da_dengue_2010.pdf).
- Lanciotti RS, Calisher CH, Gubler DJ, Chang GJ, Vorndam AV (1992) Rapid detection and typing of dengue viruses from clinical samples by using reverse transcriptase-polymerase chain reaction. *J Clin Microbiol* 30: 545–551.
- Igarashi A (1978) Isolation of a Singh's *Aedes albopictus* cell clone sensitive to Dengue and Chikungunya viruses. *J Gen Virol* 40: 531–544.
- Gubler D, Kuno G, Sather G, Velez M, Oliver A (1984) Mosquito cell cultures and specific monoclonal antibodies in surveillance for dengue viruses. *Am J Trop Med Hyg* 33: 158–165.
- Leitmeyer KC, Vaughn DW, Watts DM, Salas R, Villalobos I, et al. (1999) Dengue virus structural differences that correlate with pathogenesis. *J Virol* 73: 4738–4747.
- Pryor MJ, Carr JM, Hocking H, Davidson AD, Li P, et al. (2001) Replication of dengue virus type 2 in human monocyte-derived macrophages: comparisons of isolates and recombinant viruses with substitutions at amino acid 390 in the envelope glycoprotein. *Am J Trop Med Hyg* 65: 427–434.
- Anderson C, Downs W, Hill A (1956) Isolation of dengue virus from a human being in Trinidad. *Science* 124: 224–225.
- Kouri G, Guzmán M, Bravo J (1987) Why dengue haemorrhagic fever in Cuba? 2. An integral analysis. *Trans R Soc Trop Med Hyg* 81: 821–823.
- Rico-Hesse R (2003) Microevolution and virulence of dengue viruses. *Adv Virus Res* 59: 315–341.
- Zagne S, Alves V, Nogueira R, Miagostovich M, Lampe E, et al. (1994) Dengue haemorrhagic fever in the state of Rio de Janeiro, Brazil: a study of 56 confirmed cases. *Trans R Soc Trop Med Hyg* 88: 677–679.
- Vasconcelos PF, de Menezes DB, Melo LP, Pessoa ET, Rodrigues SG, et al. (1995) A large epidemic of dengue fever with dengue hemorrhagic cases in Ceará State, Brazil, 1994. *Rev Inst Med Trop Sao Paulo* 37: 253–255.
- Miagostovich M, Nogueira R, Schatzmayr H, Lanciotti R (1998) Molecular epidemiology of DEN-2 virus in Brazil. *Mem Inst Oswaldo Cruz* 93: 625–626.
- dos Santos F, Miagostovich M, Nogueira R, Edgil D, Schatzmayr H, et al. (2002) Complete nucleotide sequence analysis of a Brazilian dengue virus type 2 strain. *Mem Inst Oswaldo Cruz* 97: 991–995.
- Pires Neto R, Lima D, de Paula S, Lima C, Rocco I, et al. (2005) Molecular epidemiology of type 1 and 2 dengue viruses in Brazil from 1988 to 2001. *Braz J Med Biol Res* 38: 843–852.
- Cordeiro M, Freese E, Schatzmayr H, Nogueira R (2008) *Vinte Anos de Evolução da Dengue no Estado de Pernambuco*. Recife: Editora Universitária, UFPE. 225 p.
- Teixeira M, Costa MC, Barreto F, Barreto M (2009) Dengue: twenty-five years since reemergence in Brazil. *Cad Saude Publica* 25 Suppl 1: S7–18.
- SVS/MS (2009) *Informe Epidemiológico da Dengue - Semanas de 1 a 52 de 2009*. [http://portal.saude.gov.br/portal/arquivos/pdf/informe\\_epidemiologico\\_semana\\_1a52\\_09\\_revisado.pdf](http://portal.saude.gov.br/portal/arquivos/pdf/informe_epidemiologico_semana_1a52_09_revisado.pdf).
- Oliveira M, Galvao Araujo J, Ferreira OJ, Ferreira D, Lima D, et al. (2010) Two lineages of dengue virus type 2, Brazil. *Emerg Infect Dis* 16: 576–578.
- Aquino J, Tang W, Ishii R, Ono T, Eshita Y, et al. (2008) Molecular epidemiology of dengue virus serotypes 2 and 3 in Paraguay during 2001–2006: the association of viral clade introductions with shifting serotype dominance. *Virus Res* 137: 266–270.
- Romano C, de Matos A, Araújo E, Villas-Boas L, da Silva W, et al. (2010) Characterization of Dengue virus type 2: new insights on the 2010 Brazilian epidemic. *PLoS One* 5: e11811.
- Rosen L (1977) The Emperor's New Clothes revisited, or reflections on the pathogenesis of dengue hemorrhagic fever. *Am J Trop Med Hyg* 26: 337–343.
- Gubler D, Reed D, Rosen L, Hitchcock JJ (1978) Epidemiology, clinical, and virologic observations on dengue in the Kingdom of Tonga. *Am J Trop Med Hyg* 27: 581–589.
- Rico-Hesse R (1990) Molecular evolution and distribution of dengue viruses type 1 and 2 in nature. *Virology* 174: 479–493.
- Rico-Hesse R (2007) Dengue virus evolution and virulence models. *Clin Infect Dis* 44: 1462–1466.
- Messer W, Vitarana U, Sivananthan K, Elvtigala J, Preethimala L, et al. (2002) Epidemiology of dengue in Sri Lanka before and after the emergence of epidemic dengue hemorrhagic fever. *Am J Trop Med Hyg* 66: 765–773.
- Messer W, Gubler D, Harris E, Sivananthan K, de Silva A (2003) Emergence and global spread of a dengue serotype 3, subtype III virus. *Emerg Infect Dis* 9: 800–809.
- Pandey B, Morita K, Kinney R, Kumatori A, Hasebe F, et al. (2003) Effect of Single Amino Acid Mutation in PrM Region of Dengue 2 Virus Associated with Increased Pathogenicity. In: *Proceedings of the 10th Asian Conference on Diarrhoeal Diseases and Nutrition; 7–9 December 2003; Dhaka, Bangladesh*.
- Bennett S, Holmes E, Chirivella M, Rodriguez D, Beltran M, et al. (2006) Molecular evolution of dengue 2 virus in Puerto Rico: positive selection in the viral envelope accompanies clade reintroduction. *J Gen Virol* 87: 885–893.
- Leitmeyer K, Vaughn D, Watts D, Salas R, Villalobos I, et al. (1999) Dengue virus structural differences that correlate with pathogenesis. *J Virol* 73: 4738–4747.
- Sánchez I, Ruiz B (1996) A single nucleotide change in the E protein gene of dengue virus 2 Mexican strain affects neurovirulence in mice. *J Gen Virol* 77 (Pt 10): 2541–2545.
- Lin C, Wu S (2003) A functional epitope determinant on domain III of the Japanese encephalitis virus envelope protein interacted with neutralizing-antibody combining sites. *J Virol* 77: 2600–2606.
- Catteau A, Kalinina O, Wagner M, Deubel V, Courageot M, et al. (2003) Dengue virus M protein contains a proapoptotic sequence referred to as ApoptoM. *J Gen Virol* 84: 2781–2793.
- Marianneau P, Flamand M, Deubel V, Desprès P (1998) Induction of programmed cell death (apoptosis) by dengue virus in vitro and in vivo. *Acta Cient Venez* 49 Suppl 1: 13–17.
- Xiao S, Zhang H, Guzman H, Tesh R (2001) Experimental yellow fever virus infection in the Golden hamster (*Mesocricetus auratus*). II. Pathology. *J Infect Dis* 183: 1437–1444.
- Varas CY (2000) Caracterización molecular de la secuencia parcial del gen de la glicoproteína NS1 del virus dengue 1 proveniente de Máncora, Peru. *Rev Med Exp* 18: 35–38.
- Carrington CV, Foster JE, Pybus OG, Bennett SN, Holmes EC (2005) Invasion and maintenance of dengue virus type 2 and type 4 in the Americas. *J Virol* 79: 14680–14687.
- McElroy KL, Santiago GA, Lennon NJ, Birren BW, Henn MR, et al. (2011) Endurance, refuge, and reemergence of dengue virus type 2, Puerto Rico, 1986–2007. *Emerg Infect Dis* 17: 64–71.
- Zhang C, Mammen MP, Chinnawitropisan P, Klungthong C, Rodpradit P, et al. (2005) Clade replacements in dengue virus serotypes 1 and 3 are associated with changing serotype prevalence. *J Virol* 79: 15123–15130.
- Li DS, Liu W, Guigon A, Mostyn C, Grant R, et al. (2010) Rapid displacement of dengue virus type 1 by type 4, Pacific region, 2007–2009. *Emerg Infect Dis* 16: 123–125.
- Añez G, Morales-Betoulle ME, Rios M (2011) Circulation of different lineages of dengue virus type 2 in Central America, their evolutionary time-scale and selection pressure analysis. *PLoS One* 6: e27459.
- Yamanaka A, Mulyatno KC, Susilowati H, Hendrianto E, Ginting AP, et al. (2011) Displacement of the predominant dengue virus from type 2 to type 1 with a subsequent genotype shift from IV to I in Surabaya, Indonesia 2008–2010. *PLoS One* 6: e27322.
